# Supplementary material for: Charge compensation improves energy transfer to realize anti-thermal-quenching and improve the CaMoO4: Sm3+ phosphors optical temperature measurement sensitivity base on the FIR model
Source: Research Square preprint supplement (doi:10.21203/rs.3.rs-3518451/v1), 2024-01-03
Supplement: Supplementary file 1 [file e346c13734cc3c56666ec30c.docx]

**Charge compensation improves energy transfer to realize anti-thermal-quenching and improve the CaMoO4: Sm3+ phosphors** **optical temperature measurement sensitivity base on the FIR model**

Hongyue Wua, e1, Bo Hua1, Xu Tanga, Beibei Chena, Dongyi Lib, Jialin Liangd, Binrong Lic, Pengwei Huoa, Jun Zhaob, Zhongfei Maa, Zhi Zhua, b*

1. Institute for Advanced Materials, School of Materials Science and Engineering, College of environmental science and engineering, School of Chemistry and Chemical Engineering, Jiangsu University, Zhenjiang 212000, P.R. China
2. Department of Biology, Hong Kong Baptist University, Kowloon Tong, Hong Kong 999077, P.R. China
3. National and Local Joint Engineering Laboratory of Municipal Sewage Resource Utilization Technology, School of Environmental Science and Engineering, Suzhou University of Science and Technology, Su Zhou 215009, P.R. China
4. College of Resources and Environment, Zhongkai University of Agriculture and Engineering, Guangzhou, 510225, China
5. Department of Chemistry, Tonghua Normal University, Tonghua 134002, P.R. China

**Corresponding Authors：**

Email: [zhuzhi@ujs.edu.cn](mailto:zhuzhi@ujs.edu.cn)


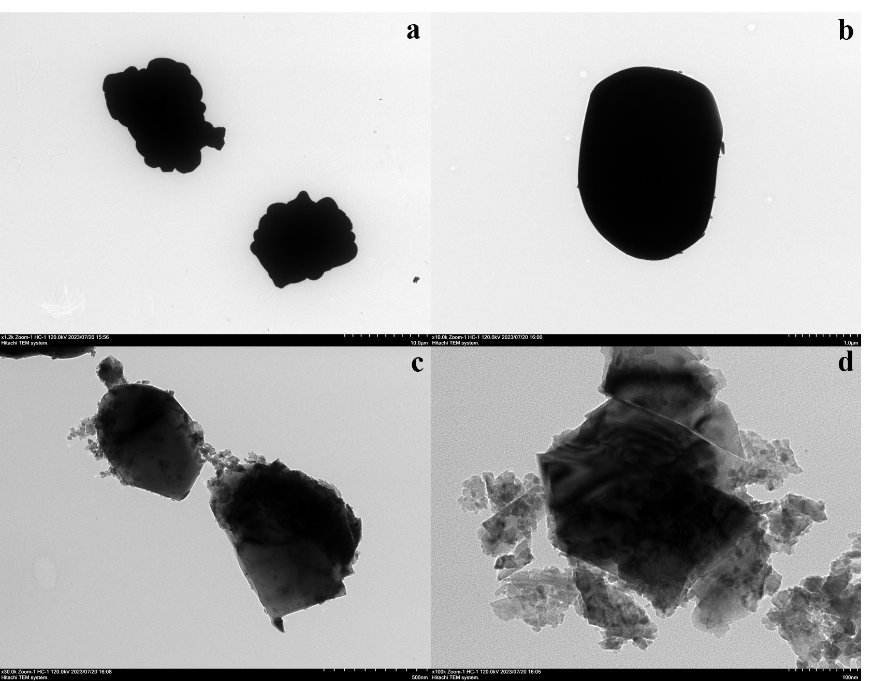


**Fig. S1.** TEM image of CaMoO4 (a, b) andCaMoO4:0.02Sm3+ (c, d).


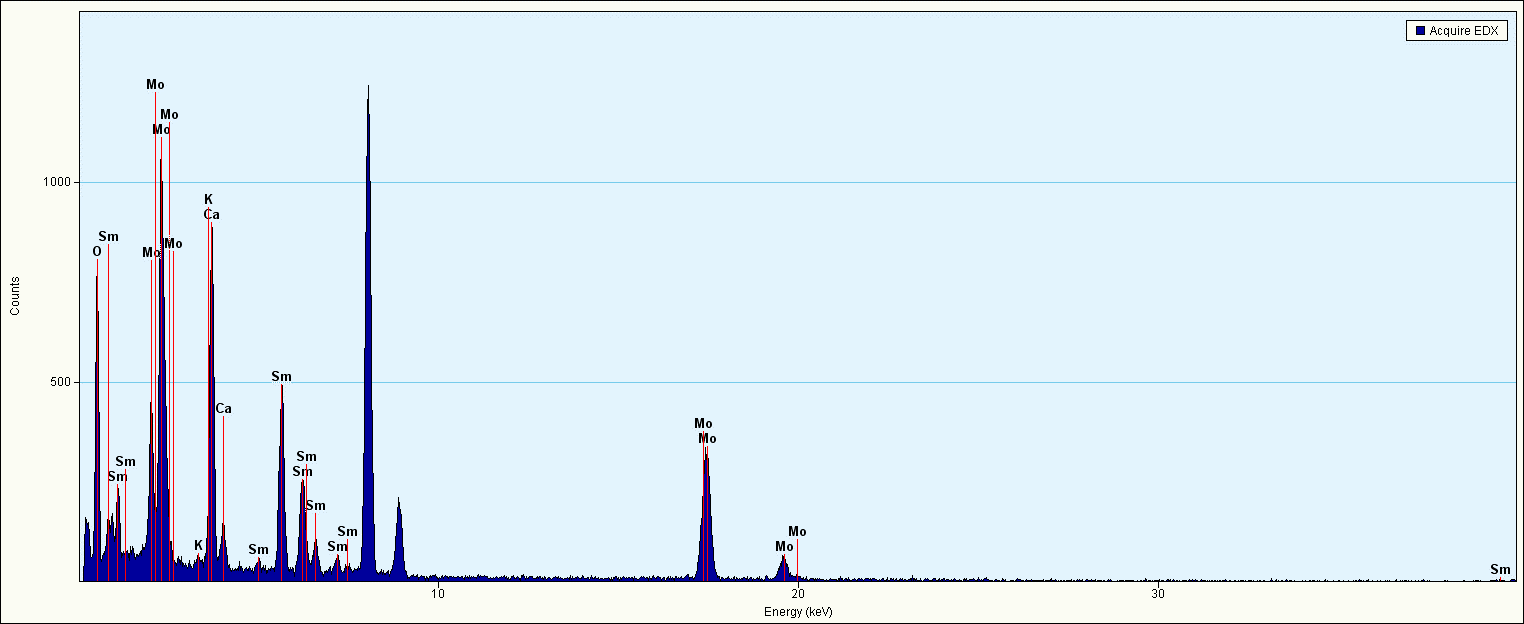


**Fig. S2.** EDS analysis of CaMoO4:0.02Sm3+, 0.02K+.


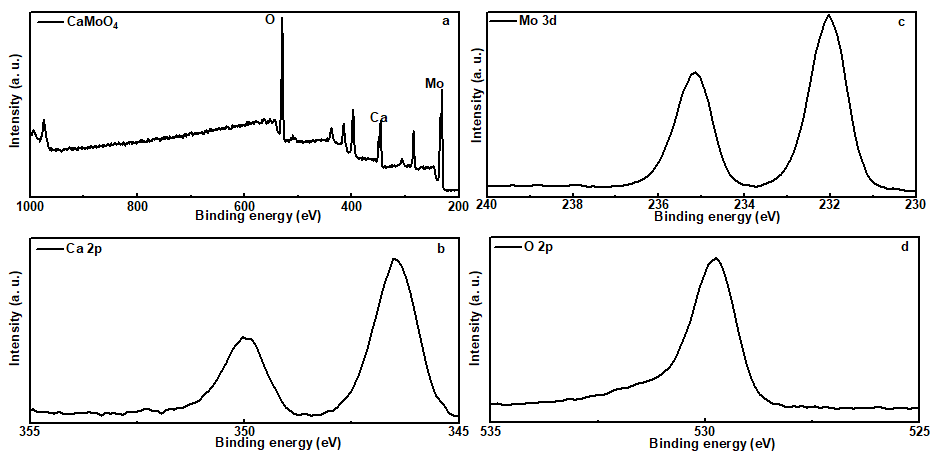


**Fig. S3.** XPS of CaMoO4.


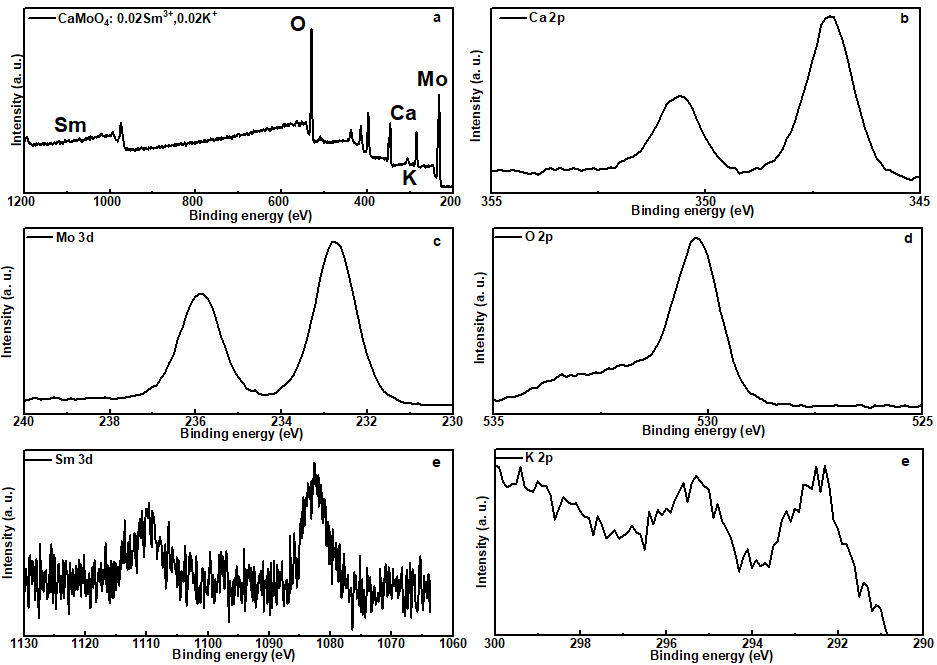


**Fig. S4.** XPS of CaMoO4: 0.02Sm3+, 0.02K+.

**
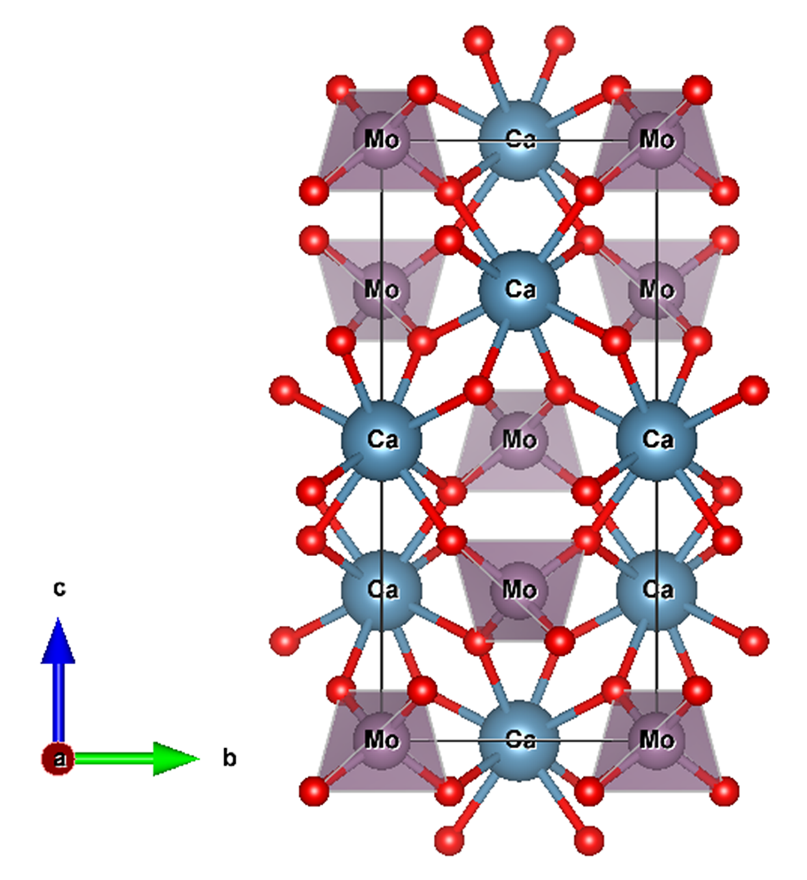
**

**Fig. S5.** The schematic diagram of CaMoO4 of scheelite structure.


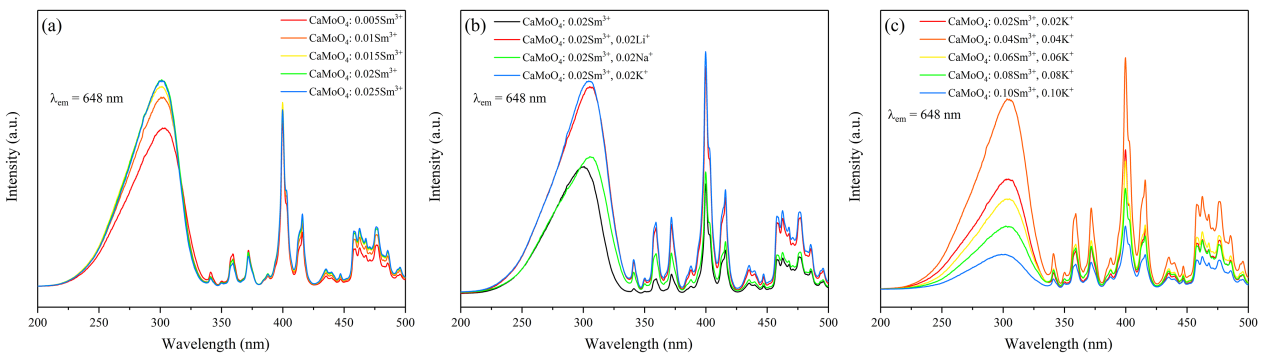


**Fig. S6.** The PLE spectra of the CaMoO4: xSm3+ (x = 0.005, 0.01, 0.015, 0.02, 0.025) phosphors (a). The PLE spectra of the CaMoO4: 0.02Sm3+, CaMoO4: 0.02Sm3+, 0.02Li+, CaMoO4: 0.02Sm3+, 0.02Na+ and CaMoO4: 0.02Sm3+, 0.02K+ phosphors (b). The PLE spectra of the CaMoO4: ySm3+, yK+ (y = 0.02, 0.04, 0.06, 0.08, 0.10) phosphors (c).

The emission peaks of Sm3+are separated by subtracting the emission spectra of CaMoO4 host from CaMoO4: 0.001Sm3+, 0.001K+, which had been normalized at 506 nm. The temperature dependent emission spectra of Sm3+ after separation is depicted in Fig.S7.


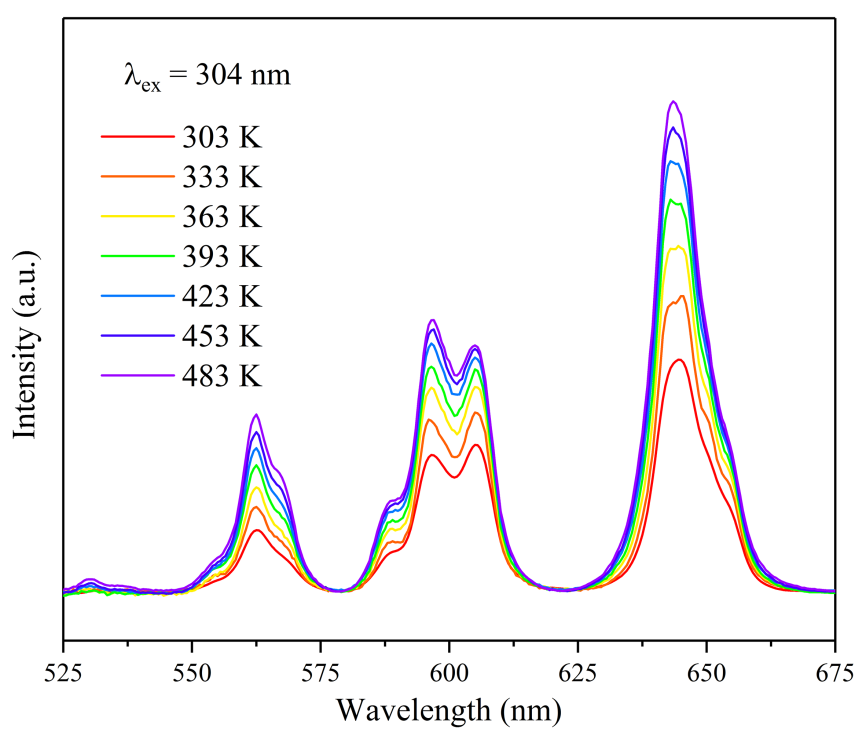


**Fig. S7.** Temperature dependent emission spectra of Sm3+ ions after separation.
